# Supplementary material for: Identification of two downregulated circRNAs in patients with acute B-lymphocytic leukemia
Source: PubMed Central journal article supplement — Oncol Lett. 2021 Dec 3;23(1):40. doi: 10.3892/ol.2021.13158 (PMC8669665; doi:10.3892/ol.2021.13158), 2021-12-03
Supplement: Supplementary_Data.pdf [file Supplementary_Data.pdf]

Figure S1. Function experiment of hsa\_circ\_0000745 in HMy2.CIR cells. Overexpression of hsa\_circ\_0000745 significantly inhibited the proliferation of HMy2.CIR cells. \*P=0.034. CCK-8, Cell Counting Kit-8; OE, overexpression plasmid; OD, optical density.

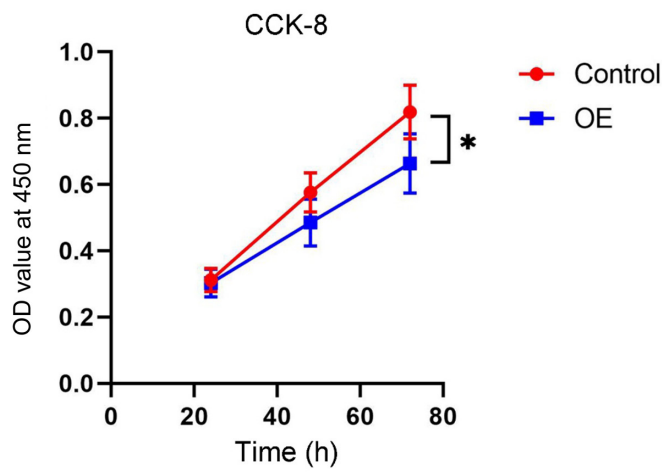

Figure S2. Validation of transfection efficiency in HMy2.CIR cells. Transfection efficiency was assessed via (A) fluorescence microscopy and (B) reverse transcription-quantitative PCR analysis. OE, overexpression plasmid; circRNA, circular RNA.

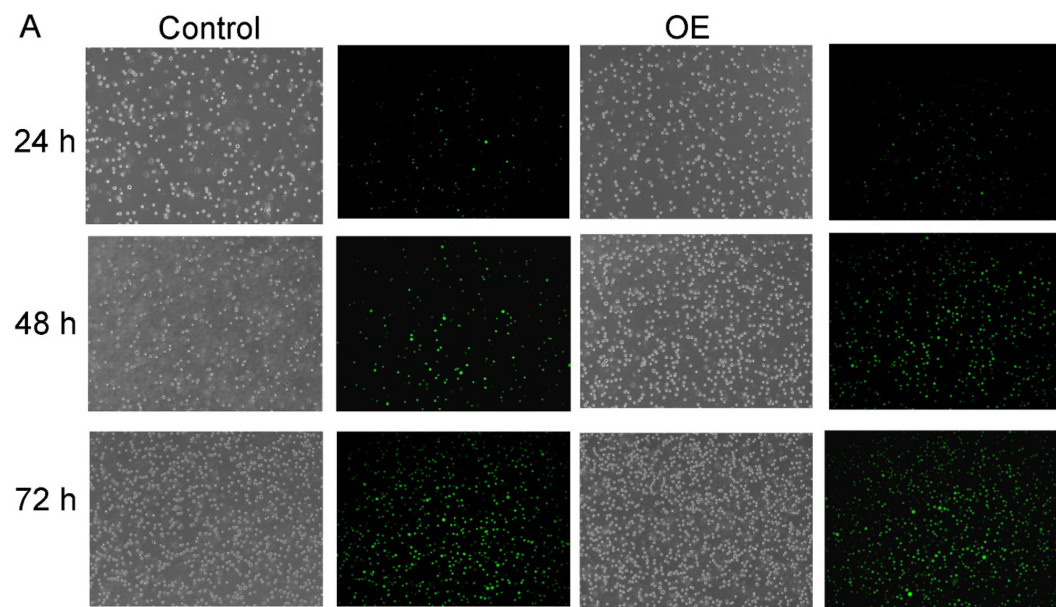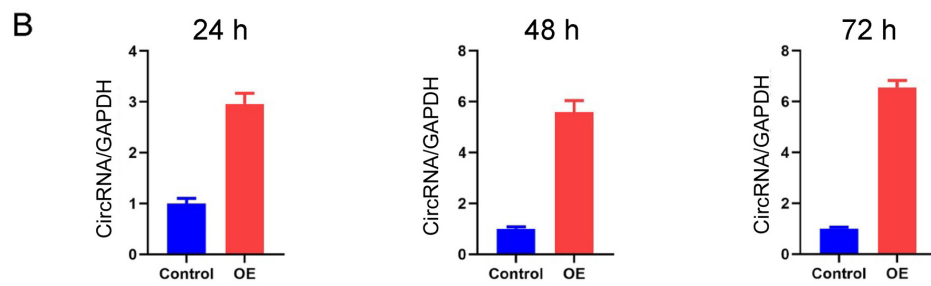

Table SI. Primer sequences used for quantitative PCR.

| Number | circRNA ID               | Forward (5'-3')         | Reverse (5'-3')       |
|--------|--------------------------|-------------------------|-----------------------|
| 1      | hsa_circ_0104812         | TCTACAGAAGGAAGCAGGCA    | CTGGAGATTCACCCACCTGT  |
| 2      | hsa_circ_0000745         | AGGCAAACGGTGAAATTAACA   | TGGCACAGACCTCTCTCTTG  |
| 3      | chr15:87949594-87966067- | CAACTAACTTGGAGCCGTGT    | TGGGCAGCAGTAATCTCCTT  |
| 4      | chr15:87898780-87966067- | CTGAGAGAGGCTGGAAGGAA    | TGGGCAGCAGTAATCTCCTT  |
| 5      | hsa_circ_0006473         | CTGATGAGGCCACAGGAAGA    | TGCAGAATTCTCCAGGTCA   |
| 6      | hsa_circ_0071106         | TGTTTTGACATAGAAGCTGCTGA | TGCTTACTTGGATATCTGCCT |
| 7      | hsa_circ_0097878         | GGAAGAAGTGCCTGATGACG    | CAGAGGCTGGGTTCCCTAAA  |

Numbers 1-7 correspond to the numbers in Fig. 4. circRNA, circular RNA.

Table SII. Detailed characteristics of patients with B-ALL and controls.

| Type      | Diagnosis | Age, years | Sex    | Percentage of blasts (%) |
|-----------|-----------|------------|--------|--------------------------|
| Patient 1 | B-ALL     | 4          | Male   | 83.45                    |
| Patient 2 | B-ALL     | 4          | Male   | 90.04                    |
| Patient 3 | B-ALL     | 5          | Male   | 92.87                    |
| Patient 4 | B-ALL     | 7          | Female | 87.74                    |
| Patient 5 | B-ALL     | 7          | Female | 89.63                    |
| Patient 6 | B-ALL     | 8          | Female | 80.71                    |
| Control 1 | ITP       | 4          | Male   | n/a                      |
| Control 2 | SLE       | 4          | Male   | n/a                      |
| Control 3 | ITP       | 5          | Male   | n/a                      |
| Control 4 | ITP       | 6          | Female | n/a                      |
| Control 5 | ITP       | 6          | Female | n/a                      |
| Control 6 | SLE       | 8          | Female | n/a                      |

B-ALL, acute B-lymphocytic leukemia; ITP, idiopathic thrombocytopenic purpura; SLE, systemic lupus erythematosus.
